# Supplementary material
Source: PubMed Central journal article supplement (PMC59827)
Supplement: pnas_211257298_3.pdf [file pnas_211257298_3.pdf]

**Table 4.** EOM-specific genes by SAM analysis

| Accession no.       | Gene                                                               | Putative function              | Change |
|---------------------|--------------------------------------------------------------------|--------------------------------|--------|
| SAM threshold = 1.0 |                                                                    |                                |        |
| L03279              | Core binding factor beta (Cbfb)                                    | Transcription regulation       | ↓      |
| U60884              | myc box dependent interacting protein 1 (Bin1)                     | Myogenesis                     | ↓      |
| AB015652            | DJ-1                                                               | Oncogene                       | ↓      |
| AW122197            | Protein kinase, cAMP-dependent regulatory, type 1, alpha (Prkar1a) | Signal transduction            | ↑      |
| L12447              | Insulin-like growth factor binding protein 5 (Igfbp5)              | Growth factor binding          | ↑      |
| AF030343            | Peroxisomal/mitochondrial dienoyl-CoA isomerase (Ech1)             | Fatty acid metabolism          | ↑      |
| D12780              | S-adenosylmethionine decarboxylase 1 (Amd1)                        | Polyamine biosynthesis         | ↓      |
| Z23077              | S-adenosylmethionine decarboxylase 2 (Amd2)                        | Polyamine biosynthesis         | ↓      |
| AJ242874            | Slow skeletal muscle troponin I (Tnni1)                            | Muscle contraction regulation  | ↑      |
| AF087687            | S100A1                                                             | Calcium-binding protein        | ↑      |
| U93291              | Skeletal muscle calsequestrin                                      | Calcium binding protein        | ↑      |
| X59382              | Parvalbumin                                                        | Calcium-binding protein        | ↓      |
| AJ006306            | Skeletal muscle calcium channel, $\gamma$ -subunit (Cacng1)        | Calcium channel subunit        | ↓      |
| M28383              | Solute carrier family 4 (anion exchanger), member 3 (Slc4a3)       | Inorganic ion transport        | ↑      |
| M15501              | Actin, alpha, cardiac (Actc1)                                      | Cytoskeletal organization      | ↑      |
| AF100171            | Myelodysplasia/myeloid leukemia factor 1 (Mlf1)                    | Unknown                        | ↓      |
| AF084482            | Transmembrane protein (Wfs1)                                       | Unknown                        | ↑      |
| SAM threshold = 0.8 |                                                                    |                                |        |
| D78382              | Transducer of ErbB-2.1 (Tob1)                                      | Signal transduction            | ↓      |
| U47323              | Stromal interaction molecule 1 (Stim1)                             | Growth suppressor              | ↑      |
| M74495              | Adenylosuccinate synthetase 1, muscle (Adss1)                      | Purine nucleotide biosynthesis | ↓      |
| M29793              | Slow/cardiac troponin C                                            | Muscle contraction regulation  | ↑      |
| X12973              | Myosin alkali light chain, fast skeletal muscle isoform            | Muscle contraction             | ↑      |
| M28729              | Tubulin $\alpha$ -1 (Tuba1)                                        | Cytoskeleton                   | ↑      |
| AI853444            | Expressed sequence tag                                             | Unknown                        | ↑      |
| AI837116            | Eexpressed sequence tag                                            | Unknown                        | ↑      |

Listed are all genes meeting SAM thresholds at which FDR = 0 for EOM versus jaw-leg. Change denotes direction of EOM expression level relative to the other muscles.
