# Supplementary material
Source: PubMed Central journal article supplement (PMC59827)
Supplement: pnas_211257298_4.pdf [file pnas_211257298_4.pdf]

Supporting information for Porter *et al.* (September 25, 2001) *Proc. Natl. Acad. Sci. USA*, 10.1073/pnas.211257298.

**Table 5.** Expression differences between extraocular and jaw or leg muscles

| Accession no.                            | Gene                                                    | Average fold difference |                   | SAM threshold |
|------------------------------------------|---------------------------------------------------------|-------------------------|-------------------|---------------|
|                                          |                                                         | EOM<br>vs.<br>leg       | EOM<br>vs.<br>jaw |               |
| <b>Transcription factor</b>              |                                                         |                         |                   |               |
| U70132                                   | Paired-like homeodomain transcription factor 2 (Pitx2)  | 28.5                    | 32.9              | 0.2           |
| AW120874                                 | *Paternally expressed gene 3 (Peg3)                     | 21.5                    | 14.6              | 0.4           |
| AF038939                                 | *Paternally expressed gene (Peg3)                       | 9.8                     | 13.6              | 0.4           |
| D13664                                   | Runt-related transcription factor (Runx2)               | 4.8                     | 3.9               | 0.2           |
| AF077861                                 | Inhibitor of DNA binding 2 (Idb2)                       | 4.8                     | 3                 | --            |
| AB029448                                 | Dlxin-1                                                 | 2.4                     | 2.5               | --            |
| L20450                                   | Zinc finger protein 97 (Zfp97)                          | 2.3                     | 2.1               | --            |
| AB012276                                 | ATFx (Atfx)                                             | 2.3                     | ns                | --            |
| X56182                                   | Myogenic factor 5 (Myf5)                                | ns                      | 4.1               | --            |
| U20344                                   | Gut-enriched Kruppel-like factor (Klf4)                 | ns                      | 2.1               | --            |
| L03279                                   | *Core binding factor $\beta$ (Cbfb)                     | ns                      | ns                | 1             |
| X63866                                   | *Cellular nucleic acid binding protein (Cnbp)           | ns                      | ns                | 0.6           |
| AF041822                                 | T-box 15 (Tbx15)                                        | ns                      | ns                | 0.4           |
| U20326                                   | *Cellular nucleic acid binding protein (Cnbp)           | ns                      | -1.7              | 0.6           |
| U21855                                   | CCR4-NOT transcription complex, subunit 7 (Cnot7)       | ns                      | -2                | --            |
| Y07836                                   | Stimulated by retinoic acid 14 (Stra14)                 | ns                      | -2                | --            |
| M61007                                   | CCAAT/enhancer binding protein (C/EBP), $\beta$ (Cebpb) | ns                      | -2.4              | 0.2           |
| X16995                                   | Nuclear receptor subfamily 4, group A, member 1 (Nr4a1) | ns                      | -2.4              | 0.2           |
| X04435                                   | Nuclear receptor subfamily 3, group C, member 1 (Nr3c1) | ns                      | -2.7              | --            |
| AF002283                                 | $\alpha$ -actinin-2 associated LIM protein (Actn2lp)    | -2.3                    | -2.1              | 0.4           |
| D14572                                   | *Core binding factor beta (Cbfb)                        | -2.3                    | -2.3              | 0.6           |
| X80338                                   | Sine oculis-related homeobox 2 (Six2)                   | -20.7                   | -23.3             | 0.2           |
| <b>Signal transduction/growth factor</b> |                                                         |                         |                   |               |
| L04678                                   | Integrin $\beta$ 4 (Itgb4)                              | 13.3                    | ns                | --            |
| U68058                                   | Secreted frizzled-related sequence protein 3 (Sfrp3)    | 13.1                    | 16.6              | --            |
| AW061337                                 | Adenylate kinase 4 (Ak4)                                | 8.9                     | 8.1               | --            |
| AF009246                                 | Ras-related protein, DEXRAS1 (Rasd1)                    | 5.9                     | 5.4               | --            |
| X81584                                   | Insulin-like growth factor binding protein-6 (Igfbp6)   | 4.6                     | ns                | 0.2           |
| AB020886                                 | Src suppressed C-kinase substrate, SSeCKS               | 4                       | 5.7               | --            |
| AF087687                                 | Calcium-binding protein S100A1 (S100a1)                 | 3.7                     | 4.1               | 1             |
| U52073                                   | N-myc downstream regulated-like protein (Ndrl)          | 3                       | 3.2               | --            |
| U67187                                   | G protein signaling regulator RGS2 (Rgs2)               | 3                       | ns                | --            |
| AF056187                                 | Insulin-like growth factor I receptor (Igf1r)           | 2.7                     | ns                | --            |
| AI848518                                 | Hematopoietic zinc finger (Hzf)                         | 2.6                     | 2.4               | --            |

| Accession no. | Gene                                                                                         | Average fold difference |            | SAM threshold |
|---------------|----------------------------------------------------------------------------------------------|-------------------------|------------|---------------|
|               |                                                                                              | EOM                     | EOM        |               |
|               |                                                                                              | vs.<br>leg              | vs.<br>jaw |               |
| AW122197      | Protein kinase, cAMP-dependent regulatory, type 1, $\alpha$ (Prkar1a)                        | 2.2                     | 2          | 1             |
| AF042491      | Putative membrane-associated progesterone receptor component (Pgrmc)                         | 2.2                     | ns         | --            |
| AF079528      | Immediate early response IER5 (Ier5)                                                         | 2.1                     | ns         | --            |
| D50086        | Neuropilin (Nrp)                                                                             | 2                       | 2.1        | 0.2           |
| X55957        | Inhibin $\alpha$ subunit (Inha)                                                              | ns                      | 16.9       | --            |
| X58289        | Protein tyrosine phosphatase, receptor type, B (Ptprb)                                       | ns                      | 10.6       | --            |
| U13370        | G protein-coupled receptor 26 (Gpcr26)                                                       | ns                      | 9          | --            |
| AF011360      | Regulator of G protein signaling 7 (Rgs7)                                                    | ns                      | 8          | --            |
| M70642        | Connective tissue growth factor (Ctgf)                                                       | ns                      | 7.3        | --            |
| Z29532        | Follistatin (Fst)                                                                            | ns                      | 4.2        | --            |
| AI848841      | Patched homolog (Ptch)                                                                       | ns                      | 3.5        | --            |
| AF031127      | Inositol trisphosphate receptor type 2 (Itpr2)                                               | ns                      | 2.7        | --            |
| AI845935      | Guanine nucleotide binding protein, $\beta$ 1 (Gnb1)                                         | ns                      | 2.3        | --            |
| D45859        | Protein phosphatase 1B, magnesium-dependent, $\beta$ isoform                                 | ns                      | 2          | --            |
| L12447        | Insulin-like growth factor binding protein 5 (Igfbp5)                                        | ns                      | ns         | 1             |
| X95403        | RAB2, member RAS oncogene family (Rab2)                                                      | ns                      | ns         | 0.4           |
| Y10971        | Odorant binding protein 1a (Obp1a)                                                           | ns                      | ns         | 0.4           |
| AW046181      | Serum/glucocorticoid-regulated kinase (Sgk)                                                  | ns                      | ns         | 0.4           |
| AI180687      | Phosphodiesterase 4B, cAMP-specific (Pde4b)                                                  | ns                      | -2         | --            |
| M81483        | Calmodulin-dependent phosphatase catalytic subunit (Cam-Prp) (Ppp3cb)                        | ns                      | -2.1       | --            |
| U89924        | Protein phosphatase 1 binding protein PTG (Ppp1r5)                                           | ns                      | -2.1       | 0.2           |
| D78382        | Transducer of ErbB-2.1 (Tob1)                                                                | ns                      | -2.2       | 0.8           |
| AF035646      | Small GTPase Rab10 (Rab10)                                                                   | ns                      | -2.3       | --            |
| M63554        | Inhibitor protein of cAMP-dependent protein kinase (Pkia)                                    | ns                      | -2.3       | 0.4           |
| AF039840      | Mitogen-activated protein (MAP) kinase-activated protein kinase 5 (Mapkapk5)                 | ns                      | -2.4       | --            |
| M31680        | Growth hormone receptor (Ghr)                                                                | ns                      | -2.4       | --            |
| D45859        | Protein phosphatase 1B, magnesium-dependent, $\beta$ isoform (Ppm1b)                         | ns                      | -2.5       | --            |
| X97052        | MAP kinase kinase (Map2k6)                                                                   | ns                      | -3         | --            |
| AF064447      | Sex-determination protein homolog (Fem1a)                                                    | ns                      | -3         | --            |
| AB025217      | Calcium binding protein P22, Sid470p (Chp)                                                   | ns                      | -3.6       | --            |
| Y13361        | RAB7, member RAS oncogene family, pseudogene 1 (Rab7-ps1)                                    | ns                      | -6.3       | 0.2           |
| X66225        | Retinoid X receptor- $\gamma$ (Rxrg)                                                         | ns                      | -8.4       | --            |
| U39066        | Murine MAP kinase kinase 6c (Map2k6)                                                         | ns                      | -8.4       | --            |
| J02935        | cAMP-dependent protein kinase type II regulatory subunit mRNA (Prkar2a)                      | ns                      | -9         | --            |
| AF058799      | 3-Monooxygenase/tryptophan 5-monooxygenase activation protein, $\gamma$ -a polypeptide (S12) | ns                      | -9.8       | --            |
| U86405        | myc box-dependent interacting protein 1 (Bin1)                                               | -1.7                    | ns         | 0.6           |
| D83073        | MAP kinase 14, p38b (Mapk14)                                                                 | -2.2                    | -2.3       | 0.2           |

| Accession no.               | Gene                                                                                         | Average fold difference |            | SAM threshold |
|-----------------------------|----------------------------------------------------------------------------------------------|-------------------------|------------|---------------|
|                             |                                                                                              | EOM                     | EOM        |               |
|                             |                                                                                              | vs.<br>leg              | vs.<br>jaw |               |
| AB015652                    | DJ-1                                                                                         | -2.8                    | -1.9       | 1             |
| U34973                      | Protein tyrosine phosphatase-like (Styx)                                                     | -4.3                    | -3.8       | --            |
| <b>Cell cycle/apoptosis</b> |                                                                                              |                         |            |               |
| AI154017                    | LIM only 2 (Lmo2)                                                                            | 12.9                    | 10.8       | --            |
| D88792                      | Double LIM protein-1                                                                         | 7.4                     | 8.6        | --            |
| AF041376                    | Cell death activator (Cidea)                                                                 | 5.8                     | 6.6        | --            |
| U47323                      | Stromal interaction molecule 1 (Stim1)                                                       | 3.3                     | 4.3        | 0.8           |
| X65128                      | Growth arrest -specific 1 (Gas1)                                                             | 3.1                     | 2.7        | 0.4           |
| AV138382                    | Programmed cell death 6 (Pcd6)                                                               | 3.1                     | ns         | --            |
| AF022465                    | High mobility group protein homolog HMG4 (Hmg4)                                              | 2.6                     | ns         | --            |
| D88793                      | Cysteine-rich protein (Csrp)                                                                 | 2.5                     | ns         | --            |
| AW121136                    | Small protein effector 1 of Cdc42                                                            | ns                      | 3.7        | --            |
| AW048937                    | Cyclin-dependent kinase inhibitor 1A, P21 (Cdkn1a)                                           | ns                      | 3.5        | --            |
| U49112                      | Programmed cell death 6 (Pcd6)                                                               | ns                      | 2.2        | --            |
| X75316                      | Seb4 (Seb4)                                                                                  | ns                      | -2.3       | 0.6           |
| AB009376                    | DNA fragmentation factor, $\alpha$ subunit (Dffa)                                            | ns                      | -2.5       | --            |
| U60884                      | myc box-dependent interacting protein 1, SH3P9 (Bin1)                                        | -2.3                    | -2.3       | 1             |
| AB016080                    | Cyclin-dependent kinase inhibitor C (P57), Calcium binding protein Kip2 (Cdkn1c)             | -10                     | -10.9      | 0.4           |
| <b>Metabolism--glucose</b>  |                                                                                              |                         |            |               |
| X51905                      | Lactate dehydrogenase 2, B chain (Ldh2)                                                      | 2.3                     | 3.6        | 0.6           |
| M32599                      | Glyceraldehyde-3-phosphate dehydrogenase (Gapd)                                              | ns                      | 2.7        | 0.4           |
| M17516                      | Lactate dehydrogenase 1, A chain (Ldh1)                                                      | ns                      | ns         | 0.6           |
| L31777                      | Triosephosphate isomerase (Tpi)                                                              | ns                      | ns         | 0.6           |
| AF029843                    | Phosphoglycerate mutase                                                                      | ns                      | ns         | 0.4           |
| L09104                      | Glucose phosphate isomerase 1 complex (Gpi1)                                                 | ns                      | ns         | 0.4           |
| AJ001418                    | Pyruvate dehydrogenase kinase 4 (Pdk4)                                                       | ns                      | ns         | 0.4           |
| J03293                      | Phosphorylase kinase $\gamma$ (Phkg)                                                         | ns                      | -2         | 0.6           |
| M19381                      | Calmodulin (Calm)                                                                            | -2.3                    | ns         | 0.6           |
| X13586                      | 2,3-Bisphosphoglycerate mutase (Bpgm)                                                        | -2.3                    | -2.4       | --            |
| X74616                      | Phosphorylase kinase $\alpha$ 1 (Phak1)                                                      | -3.8                    | -4         | 0.4           |
| AF080469                    | Glucose-6-phosphatase transport protein 1, putative glycogen storage disease type 1b protein | -19.4                   | -25.1      | 0.4           |
| X98848                      | 6-Phosphofructo-2-kinase/fructose-2,6-bisphosphatase (Pfkfb1)                                | -19.5                   | -19.1      | --            |
| D42083                      | Fructose 1,6-bisphosphatase (Fdb2)                                                           | -19.5                   | -26.5      | 0.2           |
| <b>Metabolism--lipid</b>    |                                                                                              |                         |            |               |
| U48403                      | Glycerol kinase (Gyk)                                                                        | 11.8                    | 14.1       | --            |
| M26270                      | Stearoyl-coenzyme A desaturase 2 (Scd2)                                                      | 2.9                     | 2.1        | 0.2           |
| M28729                      | Peroxisomal acyl-CoA oxidase, muspaox (Acox)                                                 | 2.2                     | 2.2        | 0.8           |
| X57638                      | Peroxisome proliferator-activated receptor (Ppara)                                           | 2.1                     | ns         | --            |
| M21285                      | Stearoyl-coenzyme A desaturase 1 (Scd1)                                                      | ns                      | 3.1        | 0.4           |
| AF049330                    | Peroxisome proliferative-activated receptor, $\gamma$ , coactivator 1 (Ppargc1)              | ns                      | 2.6        | --            |

| Accession no.                                             | Gene                                                                   | Average fold difference |         | SAM threshold |
|-----------------------------------------------------------|------------------------------------------------------------------------|-------------------------|---------|---------------|
|                                                           |                                                                        | EOM                     | EOM     |               |
|                                                           |                                                                        | vs. leg                 | vs. jaw |               |
| AF030343                                                  | Peroxisomal/mitochondrial dienoyl-CoA isomerase ECH1p (Ech1)           | ns                      | 2.1     | 1             |
| U89352                                                    | Lysophospholipase I (Lypla1)                                           | ns                      | -6      | --            |
| D50430                                                    | Glycerol-3-phosphate dehydrogenase (Gdm1)                              | -2.7                    | -2.1    | --            |
| M25558                                                    | Glycerolphosphate dehydrogenase 1, cytoplasmic adult (Gdc1)            | -3                      | -3.1    | 0.6           |
| <b>Metabolism--other</b>                                  |                                                                        |                         |         |               |
| AB001607                                                  | Prostacyclin synthase (Ptgis)                                          | 7                       | ns      | --            |
| J04758                                                    | Tryptophan hydroxylase (Tph)                                           | 5                       | ns      | --            |
| AI851255                                                  | Cathepsin B (Ctsb)                                                     | 4.3                     | 4.3     | --            |
| J02980                                                    | Alkaline phosphatase 2 (Akp2)                                          | 4.2                     | 3.6     | --            |
| AF068199                                                  | D-dopachrome tautomerase (Ddt)                                         | 4.1                     | 3.8     | 0.2           |
| Z49204                                                    | Nicotinamide nucleotide transhydrogenase (Nnt)                         | 2.3                     | 3.3     | 0.6           |
| AF061017                                                  | UDP-glucose dehydrogenase (Ugdh)                                       | 2.3                     | ns      | --            |
| AI551087                                                  | Xanthine dehydrogenase (Xdh)                                           | 2.1                     | ns      | --            |
| U20892                                                    | Phosphoribosylglycinamide formyltransferase (Gart)                     | ns                      | 2.2     | 0.2           |
| M88694                                                    | Thioether S-methyltransferase (Temt)                                   | ns                      | 2       | --            |
| AF023463                                                  | Lupus nephritis-associated peptide 1 (Lnap1)                           | ns                      | 1.7     | 0.4           |
| AF055983                                                  | Proteasome (prosome, macropain) subunit, $\alpha$ type 3 (Psma3)       | ns                      | ns      | 0.4           |
| Z50159                                                    | Suppressor of initiator codon mutations, related sequence 1 (Sui1-rs1) | ns                      | ns      | 0.4           |
| AB021122                                                  | Translocase of inner mitochondrial membrane 23 homolog (Timm23)        | ns                      | ns      | 0.4           |
| U08440                                                    | Cytochrome c oxidase, subunit VI a, polypeptide 1 (Cox6a1)             | ns                      | ns      | 0.4           |
| AI153959                                                  | Sialyltransferase 10 ( $\alpha$ -2,3-sialyltransferase VI) (Siat10)    | ns                      | -2.8    | 0.4           |
| AF017639                                                  | Carboxypeptidase X2                                                    | ns                      | -4.5    | --            |
| Y15003                                                    | $\beta$ -galactoside $\alpha$ -2,3-sialyltransferase (Siat9)           | -4.3                    | -4.8    | 0.4           |
| D12780                                                    | S-adenosylmethionine decarboxylase (Amd1)                              | -8.6                    | -6.4    | 1             |
| Z23077                                                    | *S-adenosylmethionine decarboxylase 3 (Amd2)                           | -17.4                   | -16     | 1             |
| Z23077                                                    | *S-adenosylmethionine decarboxylase 3 (Amd2)                           | -29.5                   | -27.6   | 0.6           |
| <b>Sarcomeric protein/excitation-contraction coupling</b> |                                                                        |                         |         |               |
| X56518                                                    | Acetylcholinesterase (Ache)                                            | 13.9                    | ns      | --            |
| M17640                                                    | Acetylcholine receptor $\alpha$ -subunit (Chrna1)                      | 9.9                     | 6.5     | 0.4           |
| D85923                                                    | Myosin heavy chain 11, smooth muscle (Myh11)                           | 6.6                     | 3.9     | 0.2           |
| L47600                                                    | Cardiac troponin T isoform A3b (Tnt2)                                  | 3                       | 3.7     | --            |
| M14537                                                    | Acetylcholine receptor $\beta$ (Chrb1)                                 | 2.1                     | ns      | --            |
| M15501                                                    | Actin, $\alpha$ , cardiac (Actc1)                                      | 2                       | 2.1     | 1             |
| AJ242874                                                  | Troponin I, skeletal, slow 1 (Tnni1)                                   | ns                      | 85.3    | 1             |
| M76599                                                    | Myosin heavy chain, cardiac muscle, adult (Myhca)                      | ns                      | 5       | --            |
| AJ131711                                                  | Troponin T1, skeletal, slow (Tnnt1)                                    | ns                      | 2.5     | 0.4           |
| X12973                                                    | Myosin light chain, alkali, fast skeletal muscle (Mylf)                | ns                      | ns      | 0.8           |
| M29793                                                    | Troponin C, cardiac/slow skeletal (Tncc)                               | ns                      | ns      | 0.8           |
| L48989                                                    | Troponin T3, skeletal, fast (Tnnt3)                                    | ns                      | ns      | 0.6           |

| Accession no.       | Gene                                                                                               | Average fold difference |         | SAM threshold |
|---------------------|----------------------------------------------------------------------------------------------------|-------------------------|---------|---------------|
|                     |                                                                                                    | EOM                     | EOM     |               |
|                     |                                                                                                    | vs. leg                 | vs. jaw |               |
| M91602              | Myosin light chain, phosphorylatable, cardiac ventricles (Mylpc)                                   | ns                      | ns      | 0.6           |
| X12972              | Myosin light chain, alkali, cardiac ventricles (Mylc)                                              | ns                      | ns      | 0.6           |
| AJ223361            | Myosin, heavy polypeptide 4, skeletal muscle (Myh4)                                                | ns                      | ns      | 0.6           |
| AJ223362            | Slow myosin heavy chain-beta                                                                       | ns                      | ns      | 0.4           |
| M12347              | Actin, $\alpha$ 1, skeletal muscle (Acta1)                                                         | ns                      | ns      | 0.4           |
| AW124250            | Myosin heavy chain, cardiac muscle, $\alpha$ , adult (Myhca)                                       | ns                      | ns      | 0.4           |
| U04541              | Tropomyosin 5 (Tpm5)                                                                               | ns                      | ns      | 0.6           |
| AB010144            | Mitsugumin29 (Mg29)                                                                                | ns                      | -2.4    | 0.4           |
| U36579              | Caveolin 3 (Cav3)                                                                                  | ns                      | -2.4    | 0.4           |
| AF091998            | *Calpain 3 (Capn3)                                                                                 | -1.9                    | -1.9    | 0.4           |
| X92523              | *Calpain 3 (Capn3)                                                                                 | -2.4                    | -2.6    | 0.2           |
| AJ001038            | M-protein (Myom2)                                                                                  | -68.7                   | -66     | 0.4           |
| Channel/transporter |                                                                                                    |                         |         |               |
| Y00305              | Potassium voltage-gated channel, shaker-related subfamily, member 1 (Kcna1)                        | 12.5                    | 13.9    | --            |
| AI849533            | *Mitochondrial chloride intracellular channel 4 (Clic4)                                            | 11.3                    | ns      | --            |
| D00466              | Apolipoprotein E (ApoE)                                                                            | 10.6                    | 4.4     | 0.4           |
| M28383              | Solute carrier family 4 (anion exchanger), member 3 (Slc4a3)                                       | 10.5                    | 13      | 1             |
| X82648              | Apolipoprotein D (ApoD)                                                                            | 4.8                     | 5.2     | 0.6           |
| U09383              | Calcium-activated potassium channel (Kcma1)                                                        | 4.1                     | 4.7     | 0.4           |
| X60367              | Retinol binding protein 1 (Rpb1)                                                                   | 4                       | 5       | --            |
| M63801              | Connexin 43, $\alpha$ -1 gap junction (Gja1)                                                       | 2.6                     | 2.6     | 0.2           |
| AI845237            | *Mitochondrial chloride intracellular channel 4 (Clic4)                                            | 2.2                     | ns      | --            |
| X59382              | *Parvalbumin (Pva)                                                                                 | ns                      | 20.2    | 1             |
| AF000149            | ATP-binding cassette, subfamily A (ABC1), member 4 (Abca4)                                         | ns                      | 6.4     | --            |
| U93291              | Calsequestrin (Casq1)                                                                              | ns                      | 4.7     | 1             |
| U49430              | Ceruloplasmin (Cp)                                                                                 | ns                      | 3.3     | --            |
| AF068244            | Cardiac calsequestrin (Casq)                                                                       | ns                      | 2.7     | 0.2           |
| AI839697            | ATPase, Na <sup>+</sup> /K <sup>+</sup> transporting, $\alpha$ 2 polypeptide (Atp1a2)              | ns                      | 2.2     | 0.6           |
| AB017112            | Solute carrier family 25 (mitochondrial carnitine/acylcarnitine translocase), member 20 (Slc25a20) | ns                      | ns      | 0.4           |
| L48687              | Sodium channel, voltage-gated, type I, $\beta$ polypeptide (Scn1b)                                 | ns                      | -1.6    | 0.4           |
| U16959              | FK506 binding protein 5 (Fkbp5)                                                                    | ns                      | -2.1    | --            |
| D86037              | ATP-binding cassette, subfamily C (CFTR/MRP), member 9 (Abcc9)                                     | ns                      | -2.1    | --            |
| X57349              | Transferrin receptor                                                                               | ns                      | -2.1    | 0.2           |
| U48398              | Aquaporin 4 (Aqp4)                                                                                 | ns                      | -2.7    | --            |
| AF020772            | *Karyopherin (importin) $\alpha$ 3 (Kpna3)                                                         | ns                      | -5.4    | --            |
| AF020771            | Karyopherin (importin) $\alpha$ 4 (Kpna4)                                                          | ns                      | -6      | --            |

| Accession no.                            | Gene                                                                                                                          | Average fold difference |         | SAM threshold |
|------------------------------------------|-------------------------------------------------------------------------------------------------------------------------------|-------------------------|---------|---------------|
|                                          |                                                                                                                               | EOM                     | EOM     |               |
|                                          |                                                                                                                               | vs. leg                 | vs. jaw |               |
| X16645                                   | ATPase, Na <sup>+</sup> /K <sup>+</sup> transporting, $\beta$ 2 polypeptide (Atp1b2)                                          | ns                      | -10.4   | --            |
| AW047023                                 | *Karyopherin (importin) $\alpha$ 3 (Kpna3)                                                                                    | -1.9                    | -1.8    | 0.4           |
| X59382                                   | *Parvalbumin (Pva)                                                                                                            | -2.1                    | ns      | 1             |
| U20619                                   | Karyopherin (importin) $\alpha$ 2 (Kpna1)                                                                                     | -2.1                    | -2.4    | 0.2           |
| AJ006306                                 | Skeletal muscle calcium channel, $\gamma$ -subunit (Cacng1)                                                                   | -32.8                   | -29.4   | 1             |
| <b>Extracellular matrix/cytoskeleton</b> |                                                                                                                               |                         |         |               |
| X13986                                   | Secreted phosphoprotein 1 (Spp1)                                                                                              | 12.2                    | 14.3    | --            |
| X70854                                   | *BM-90/fibulin extracellular matrix glycoprotein (Fbln1)                                                                      | 11.4                    | 13      | --            |
| D78274                                   | Dermatan sulphate proteoglycan 3 (Dspg3)                                                                                      | 9.5                     | 11.7    | --            |
| X13297                                   | Vascular smooth muscle $\alpha$ -actin (Actvs)                                                                                | 8.3                     | ns      | 0.2           |
| X70853                                   | *BM-90/fibulin extracellular matrix glycoprotein (Fbln1)                                                                      | 6.7                     | 2.5     | --            |
| M11533                                   | Myelin basic protein (Mbp)                                                                                                    | 6                       | 5.7     | 0.2           |
| D00613                                   | Matrix $\gamma$ -carboxyglutamate (gla) protein (Mglap)                                                                       | 4.2                     | 3.8     | 0.2           |
| M37335                                   | Myelin proteolipid protein (Plp)                                                                                              | 4                       | ns      | --            |
| AF013262                                 | Lumican (Lum)                                                                                                                 | 3.7                     | 2.7     | 0.4           |
| Z38110                                   | Peripheral myelin protein (Pmp22)                                                                                             | 3.6                     | 2.8     | 0.4           |
| AB010266                                 | Creb-rp, Tnx and Cyp21 genes for cAMP response element binding protein-related protein, tenascin-X and steroid 21-hydroxylase | 2.8                     | 2.5     | 0.2           |
| X53928                                   | Biglycan (Bgn)                                                                                                                | 2.7                     | 2.5     | 0.6           |
| X52046                                   | Procollagen, type III, $\alpha$ 1 (Col3a1)                                                                                    | 2.6                     | 1.8     | 0.6           |
| AW121179                                 | Microfibrillar-associated protein 5 (Mfap5)                                                                                   | 2.4                     | 2.8     | 0.2           |
| M28729                                   | Tubulin $\alpha$ -1 (Tuba1)                                                                                                   | 2.3                     | 2.3     | 0.8           |
| L23769                                   | Microfibril-associated glycoprotein (Mfap2)                                                                                   | ns                      | 3.5     | --            |
| U69262                                   | Matrilin-2 precursor (Matn2)                                                                                                  | ns                      | 3       | --            |
| AI845652                                 | Proteolipid M6B isoform TMD-omega (M6b)                                                                                       | ns                      | 2.6     | --            |
| AI843799                                 | Actin-crosslinking protein 7 (Aclp7)                                                                                          | ns                      | 2.5     | 0.2           |
| U43541                                   | Laminin, $\beta$ 2 (Lamb2)                                                                                                    | ns                      | 2.1     | --            |
| M28727                                   | Tubulin $\alpha$ 2 (Tuba2)                                                                                                    | ns                      | 1.6     | 0.4           |
| L29468                                   | Cofilin 2, muscle (Cfl2)                                                                                                      | ns                      | ns      | 0.4           |
| X69064                                   | Ankyrin 1 (Ank1)                                                                                                              | ns                      | -2      | 0.4           |
| AB014464                                 | MGC-24v                                                                                                                       | ns                      | -2      | 0.4           |
| D17577                                   | Kinesin heavy chain member 1B (Kif1b)                                                                                         | ns                      | -2.9    | 0.2           |
| AF057301                                 | Keratocan (Ktcn)                                                                                                              | ns                      | -3.1    | --            |
| L18880                                   | Vinculin (Vcl)                                                                                                                | ns                      | -5.1    | --            |
| U16741                                   | Capping protein $\alpha$ 2 (Cappa2)                                                                                           | -2                      | ns      | 0.4           |
| <b>Immunology/cell defense</b>           |                                                                                                                               |                         |         |               |
| M29009                                   | *Complement factor H-related protein                                                                                          | 12.3                    | 5.8     | 0.2           |
| X78445                                   | Cytochrome P450 (Cyp1-b-1)                                                                                                    | 8.8                     | 9.1     | --            |
| X07967                                   | pM1 protein, member of XLR family expressed in lymphoid cells (Xlr)                                                           | 3.7                     | ns      | --            |
| AB024538                                 | Immunoglobulin superfamily containing leucine-rich repeat (Islr)                                                              | 3.4                     | 2.3     | 0.2           |
| AB012693                                 | CD47 antigen (Itgp)                                                                                                           | 3.2                     | 2.7     | 0.2           |
| M29008                                   | *Complement factor H-related protein                                                                                          | ns                      | 5.4     | --            |
| M12660                                   | Complement component factor h (Cfh)                                                                                           | ns                      | 4.3     | 0.2           |

| Accession no.         | Gene                                                                                                  | Average fold difference |            | SAM threshold |
|-----------------------|-------------------------------------------------------------------------------------------------------|-------------------------|------------|---------------|
|                       |                                                                                                       | EOM                     | EOM        |               |
|                       |                                                                                                       | vs.<br>leg              | vs.<br>jaw |               |
| V00835                | Metallothionein 1 (Mt1)                                                                               | ns                      | 3          | 0.2           |
| U38261                | Extracellular superoxide dismutase (Sod3)                                                             | ns                      | 2.7        | 0.2           |
| M68898                | Mast cell protease 5 (Mcpt5)                                                                          | ns                      | 2.2        | --            |
| U60473                | CD59 antigen (Cd59a)                                                                                  | ns                      | 2          | 0.2           |
| U47737                | Lymphocyte antigen 6 complex, locus E (Ly6e)                                                          | ns                      | ns         | 0.4           |
| L41365                | Decay accelerating factor 2 (Daf2)                                                                    | ns                      | -10.7      | 0.2           |
| J03398                | P glycoprotein 2 (Pgy2)                                                                               | -2.3                    | ns         | --            |
| V00821                | Immunoglobulin mu encoding the C terminus of the membrane-bound form                                  | -4                      | -3.5       | --            |
| D63679                | Decay accelerating factor 1 (Daf1)                                                                    | -5                      | -7         | --            |
| Other/uncharacterized |                                                                                                       |                         |            |               |
| AI838080              | Leukemia-associated gene (Lag)                                                                        | 9.6                     | 9.6        | --            |
| X83569                | Neuronatin (Nnat)                                                                                     | 7.7                     | 8.2        | --            |
| U24703                | Reelin (Reln)                                                                                         | 7.3                     | 5.8        | --            |
| AW046850              | Odorant-binding protein Ib (Obp1b)                                                                    | 6.2                     | ns         | --            |
| AF084482              | Transmembrane protein (Wfs1)                                                                          | 5.5                     | 6.9        | 1             |
| AI835274              | RAD21 homolog, <i>Schizosaccharomyces pombe</i> (Rad21)                                               | 5.2                     | ns         | --            |
| AJ000990              | Legumain (Prsc1)                                                                                      | 4                       | ns         | 0.2           |
| X66402                | Matrix metalloproteinase 3 (Mmp3)                                                                     | 3.9                     | ns         | --            |
| M91380                | Follistatin-like (Fstl)                                                                               | 3                       | 2.3        | --            |
| AF042139              | 60-kDa ribonucleoprotein Ro (Ssa2)                                                                    | 2.6                     | ns         | --            |
| AB025406              | Sid23p                                                                                                | 2.5                     | 2.5        | 0.2           |
| X86000                | N-glycan $\alpha$ 2,8-sialyltransferase (Siat8d)                                                      | 2.2                     | ns         | --            |
| AA717826              | Early quiescence protein-1 (Eq1)                                                                      | 2.2                     | ns         | --            |
| AF096875              | Type 2 deiodinase (Dio2)                                                                              | 2.1                     | ns         | --            |
| AI853172              | Ectoplacental cone, invasive trophoblast giant cells, extraembryonic ectoderm and chorion sequence 21 | ns                      | 5.9        | --            |
| AB025412              | odd Oz/ten-m homolog 3 (Odz3)                                                                         | ns                      | 4.5        | --            |
| Y07812                | Myelin and lymphocyte protein; T cell differentiation protein (Mal)                                   | ns                      | 2.6        | --            |
| AF002718              | ATPase inhibitor (Atpi)                                                                               | ns                      | 2.1        | 0.2           |
| M74495                | Adenylosuccinate synthetase 1, muscle (Adss1)                                                         | ns                      | ns         | 0.8           |
| AF008595              | Major allergen 1-like (Mja1l)                                                                         | ns                      | ns         | 0.6           |
| X58196                | H19 fetal liver                                                                                       | ns                      | ns         | 0.6           |
| U78770                | Trefoil factor 2 (spasmolytic protein 1) (Tff2)                                                       | ns                      | ns         | 0.4           |
| AJ002307              | Synaptogyrin 2 (Syng2)                                                                                | ns                      | ns         | 0.4           |
| D14485                | DbpA murine homologue                                                                                 | ns                      | ns         | 0.4           |
| AB017918              | Gross cystic disease fluid protein 15                                                                 | ns                      | ns         | 0.4           |
| X06407                | Translationally regulated transcript (21 kDa) (Trt)                                                   | ns                      | ns         | 0.4           |
| AW121235              | Vesicle-associated membrane protein, associated protein A (33 kDa) (Vapa)                             | ns                      | ns         | 0.4           |
| AI847314              | Anaphase-promoting complex subunit 5 (Anpc5)                                                          | ns                      | ns         | 0.4           |
| AI854802              | Muscleblind-like ( <i>Drosophila</i> )                                                                | ns                      | ns         | 0.4           |
| AW122882              | Vesicle-associated membrane protein 2 (Vamp2)                                                         | ns                      | ns         | 0.4           |
| U00677                | Syntrophin, acidic 1 (Snta1)                                                                          | ns                      | -1.8       | 0.4           |
| AW227647              | LAG protein (Lag)                                                                                     | ns                      | -2.2       | 0.2           |
| AW046579              | F-box protein (Fba)                                                                                   | ns                      | -2.7       | --            |
| AW120711              | DNA j protein b9 (Dnajb9)                                                                             | ns                      | -3         | --            |

| Accession no.                 | Gene                                                                                                         | Average fold difference |         | SAM threshold |
|-------------------------------|--------------------------------------------------------------------------------------------------------------|-------------------------|---------|---------------|
|                               |                                                                                                              | EOM                     | EOM     |               |
|                               |                                                                                                              | vs. leg                 | vs. jaw |               |
| AJ011118                      | Skeletal muscle and cardiac protein                                                                          | ns                      | -3.3    | 0.2           |
| X76652                        | Retinoic acid induced, 23f8 (Rai2)                                                                           | ns                      | -4.1    | --            |
| AW227650                      | Casein $\kappa$ (Csnk)                                                                                       | ns                      | -4.7    | 0.2           |
| AI837005                      | Testis abundant mRNA sequence                                                                                | ns                      | -5.4    | --            |
| AF088983                      | Heat shock protein hsp40-3                                                                                   | ns                      | -23.1   | --            |
| AW048272                      | Src homology 3-binding domain glutamic acid-rich protein (Sh3bgr)                                            | -1.6                    | ns      | 0.4           |
| AI843476                      | Pantophysin (Pphn)                                                                                           | -1.8                    | ns      | 0.4           |
| AI845732                      | T-complex protein 1, related sequence 1 (Tcpl-rs1)                                                           | -2.1                    | -2      | 0.4           |
| AI846152                      | Down's syndrome critical region homolog 1 (human) (Dscr1)                                                    | -2.9                    | -3.1    | 0.4           |
| AI846214                      | Pleckstrin homology-like domain, family A, member 3 (Phlda3)                                                 | -3.1                    | -2.4    | 0.6           |
| AF100171                      | Myelodysplasia/myeloid leukemia factor 1 (Mlf1)                                                              | -4.6                    | -4.5    | 1             |
| Expressed sequence tags (EST) |                                                                                                              |                         |         |               |
| AI853444                      | EST                                                                                                          | 25.4                    | 20.5    | 0.8           |
| AI854793                      | EST, moderately similar to human guanine nucleotide-binding protein G(T) $\gamma$ -1 subunit                 | 19.6                    | 19.2    | 0.2           |
| AW120882                      | EST, weakly similar to <i>Escherichia coli</i> 3-oxoacyl-[acyl-carrier protein] reductase                    | 19                      | 24.9    | 0.2           |
| AI853444                      | EST                                                                                                          | 17.3                    | 16.1    | 0.8           |
| AI606967                      | EST                                                                                                          | 12.1                    | 9.1     | --            |
| AW046708                      | EST, highly similar to rat spectrin $\alpha$ chain, nonerythroid                                             | 12.1                    | ns      | --            |
| AW046857                      | EST, highly similar to human myosin light chain 1, slow-twitch muscle A isoform                              | 11.1                    | 5.6     | 0.2           |
| AW215551                      | EST, highly similar to <i>Caenorhabditis elegans</i> hypothetical 94.2-kDa protein C38D4.5 in chromosome III | 9.8                     | 12.7    | --            |
| AW122372                      | DNA segment, chromosome 10, Brigham & Women's Genetics 0791 expressed                                        | 6                       | 7       | --            |
| AI839718                      | EST                                                                                                          | 6                       | 6.4     | --            |
| AI006228                      | EST, highly similar to ERBB3 rat ERBB-3 receptor protein-tyrosine kinase precursor                           | 5.8                     | 6.4     | --            |
| AI837116                      | EST                                                                                                          | 4.3                     | 4       | 0.8           |
| AW123061                      | EST                                                                                                          | 4.1                     | 2.8     | --            |
| AI747444                      | EST, highly similar to human KIAA0512 protein                                                                | 3.5                     | ns      | --            |
| AA919594                      | EST                                                                                                          | 3.4                     | 4.3     | 0.6           |
| AI504338                      | EST                                                                                                          | 3.4                     | 2.7     | --            |
| C85523                        | EST                                                                                                          | 3                       | ns      | 0.4           |
| AI843802                      | EST                                                                                                          | 2.9                     | ns      | --            |
| AI836446                      | EST, moderately similar to human KIAA1398 protein                                                            | 2.8                     | 2.6     | --            |
| AI852098                      | EST                                                                                                          | 2.8                     | 2.5     | --            |
| AA822174                      | EST                                                                                                          | 2.6                     | 2.8     | --            |
| AI642389                      | EST, highly similar to ER23 human ER lumen protein retaining receptor 3                                      | 2.6                     | ns      | --            |
| AI844626                      | EST, highly similar to Gatm rat glycine amidinotransferase precursor                                         | 2.5                     | 2.5     | --            |



| Accession no. | Gene                                                                                                                 | Average fold difference |            | SAM threshold |
|---------------|----------------------------------------------------------------------------------------------------------------------|-------------------------|------------|---------------|
|               |                                                                                                                      | EOM                     | EOM        |               |
|               |                                                                                                                      | vs.<br>leg              | vs.<br>jaw |               |
| AA839379      | EST                                                                                                                  | 2.4                     | 2.5        | --            |
| AI848584      | EST                                                                                                                  | 2.4                     | 2.5        | 0.2           |
| AI836916      | EST                                                                                                                  | 2.3                     | ns         | --            |
| AW046661      | EST, moderately similar to human KIAA1029 protein                                                                    | 2.1                     | 2          | --            |
| AW210370      | DNA segment, chromosome 16, ERATO Doi 536, expressed D16ErtD536e                                                     | 2.1                     | ns         | --            |
| AI854771      | EST                                                                                                                  | 2                       | 2          | 0.6           |
| AW122271      | EST                                                                                                                  | ns                      | 7.2        | --            |
| AI840925      | EST, highly similar to hypothetical <i>Saccharomyces cerevisiae</i> 66.5-kDa protein in ADE12-RAP1 intergenic region | ns                      | 4.9        | --            |
| AW046158      | DNA segment, chromosome 13, ERATO Doi 275, expressed D13ErtD275e                                                     | ns                      | 4.2        | --            |
| AA407132      | EST                                                                                                                  | ns                      | 4          | --            |
| AI853019      | EST                                                                                                                  | ns                      | 3.9        | --            |
| AI841606      | EST                                                                                                                  | ns                      | 3.8        | --            |
| AF037312      | EST, highly similar to <i>Mus musculus</i> sulfonyleurea receptor-1                                                  | ns                      | 3.2        | --            |
| AI844839      | EST, Weakly similar to <i>M. musculus</i> Form mouse formin                                                          | ns                      | 3.1        | --            |
| AI643731      | EST                                                                                                                  | ns                      | 2.5        | --            |
| AI854020      | DNA segment, chromosome 18, UCLA 3 D18Ucla3                                                                          | ns                      | 2.3        | --            |
| AI195392      | EST, highly similar to human $\alpha$ -actin 1, cytoskeletal isoform                                                 | ns                      | 2          | --            |
| AI835359      | EST                                                                                                                  | ns                      | ns         | 0.6           |
| AA870917      | EST                                                                                                                  | ns                      | ns         | 0.4           |
| AI853444      | EST                                                                                                                  | ns                      | ns         | 0.4           |
| AI848056      | EST, highly similar to IF31_human eukaryotic translation initiation factor 3, subunit 1                              | ns                      | ns         | 0.4           |
| AI842808      | EST                                                                                                                  | ns                      | ns         | 0.4           |
| AI837403      | EST                                                                                                                  | ns                      | ns         | 0.4           |
| AI842432      | EST                                                                                                                  | ns                      | ns         | 0.4           |
| AI837905      | EST                                                                                                                  | ns                      | ns         | 0.4           |
| AW045632      | EST                                                                                                                  | ns                      | ns         | 0.6           |
| AW124226      | EST                                                                                                                  | ns                      | ns         | 0.4           |
| AI849271      | EST                                                                                                                  | ns                      | ns         | 0.4           |
| AI836718      | EST                                                                                                                  | ns                      | ns         | 0.4           |
| AI847584      | EST                                                                                                                  | ns                      | ns         | 0.4           |
| AI844737      | EST                                                                                                                  | ns                      | -1.8       | 0.4           |
| AW049373      | EST                                                                                                                  | ns                      | -1.9       | 0.4           |
| AA681807      | EST, Highly similar to <i>Oryctolagus cuniculus</i> glycogen debranching enzyme                                      | ns                      | -2.1       | 0.2           |
| AI853642      | EST, highly similar to human eukaryotic initiation factor 4 $\gamma$                                                 | ns                      | -2.2       | 0.4           |
| AW060212      | EST, weakly similar to <i>M. musculus</i> ubiquitin-protein ligase E3- $\alpha$                                      | ns                      | -2.3       | --            |
| AI854008      | EST, Weakly similar to <i>D.melanogaster</i> CG7611 gene product                                                     | ns                      | -2.5       | --            |

| Accession no. | Gene                                                                                                                  | Average fold difference |                   | SAM threshold |
|---------------|-----------------------------------------------------------------------------------------------------------------------|-------------------------|-------------------|---------------|
|               |                                                                                                                       | EOM<br>vs.<br>leg       | EOM<br>vs.<br>jaw |               |
| AA822412      | EST, weakly similar to <i>S. cerevisiae</i> ADP-ribosylation factor                                                   | ns                      | -2.5              | --            |
| AW125421      | DNA segment, chromosome 16, Wayne State Univ. 65, expressed D16Wsu65e                                                 | ns                      | -2.5              | 0.2           |
| AW230891      | EST, highly similar to human leucine-rich $\alpha$ -2-glycoprotein                                                    | ns                      | -2.9              | --            |
| AI851119      | DNA segment, chromosome 17, ERATO Doi 315, expressed D17Erd315e                                                       | ns                      | -3                | --            |
| AA288979      | EST                                                                                                                   | ns                      | -3                | --            |
| AI853240      | EST, moderately similar to human $\beta$ -tubulin cofactor E                                                          | ns                      | -3.1              | --            |
| AI842192      | EST                                                                                                                   | ns                      | -3.1              | 0.2           |
| AW122957      | EST                                                                                                                   | ns                      | -3.2              | --            |
| AI846896      | EST                                                                                                                   | ns                      | -3.2              | 0.2           |
| AA717740      | EST, Weakly similar to <i>D.melanogaster</i> CG5181 gene product                                                      | ns                      | -4.1              | --            |
| AW227650      | EST                                                                                                                   | ns                      | -4.7              | 0.4           |
| AW124346      | EST                                                                                                                   | ns                      | -5.2              | --            |
| AW122517      | EST, highly similar to <i>M. musculus</i> probable ubiquitin carboxyl-terminal hydrolase                              | ns                      | -7.2              | --            |
| AI020029      | EST                                                                                                                   | ns                      | -7.6              | --            |
| AI852376      | <i>M. musculus</i> adult male kidney cDNA, RIKEN full-length enriched library, clone:0610017I22, full insert sequence | ns                      | -10.1             | --            |
| AI848325      | EST                                                                                                                   | -1.7                    | ns                | 0.4           |
| AW122625      | EST, moderately similar to PTD015                                                                                     | -1.8                    | ns                | 0.4           |
| AI787713      | DNA segment, chromosome 19, ERATO Doi 721, expressed D19Erd721e                                                       | -2.2                    | ns                | --            |
| AW121304      | DNA segment, chromosome 6, ERATO Doi 253, expressed D6Erd253e                                                         | -2.2                    | -2.3              | 0.2           |
| AW120683      | EST, highly similar to human ubiquitin-conjugating enzyme E2-CDC34 complementing                                      | -2.4                    | -2.3              | 0.4           |
| AI853930      | EST                                                                                                                   | -2.4                    | -2.4              | 0.2           |
| AW045965      | EST, weakly similar to <i>C. elegans</i> predicted by using Genefinder                                                | -2.4                    | -2.6              | --            |
| AA867340      | EST, highly similar to human; the ha0919 gene product is novel                                                        | -2.6                    | -2.3              | 0.4           |
| AW124623      | EST, highly similar to <i>A. thaliana</i> ubiquitin-conjugating enzyme E2-19 KD                                       | -2.7                    | -2.5              | 0.6           |
| AI836034      | EST, weakly similar to <i>M. musculus</i> AF114379_1 cypher2                                                          | -2.8                    | -2.7              | 0.4           |
| AA690483      | EST                                                                                                                   | -3                      | -2.6              | --            |
| C80836        | EST                                                                                                                   | -3.5                    | -3.4              | 0.2           |
| AA795541      | EST, weakly similar to <i>M. muscularis</i> AF159856_1 N system amino acids transporter NAT-1                         | -4.3                    | -4.3              | 0.4           |
| AA873956      | EST                                                                                                                   | -20.4                   | -17.6             | --            |

For Affymetrix analysis, positive values indicate higher gene expression in EOM, negative values indicate lower expression in EOM, and ns indicates comparison was not significant, either because the replicates did not all agree on the direction of change or the average fold difference was < 2-fold. SAM thresholds also are indicated for each gene. -- indicates did not meet SAM analysis threshold between 0.4 and 1. \* denotes results obtained with two different probes in the Affymetrix microarray.
