# Supplementary material
Source: PubMed Central journal article supplement (PMC59827)

# SAM Plot

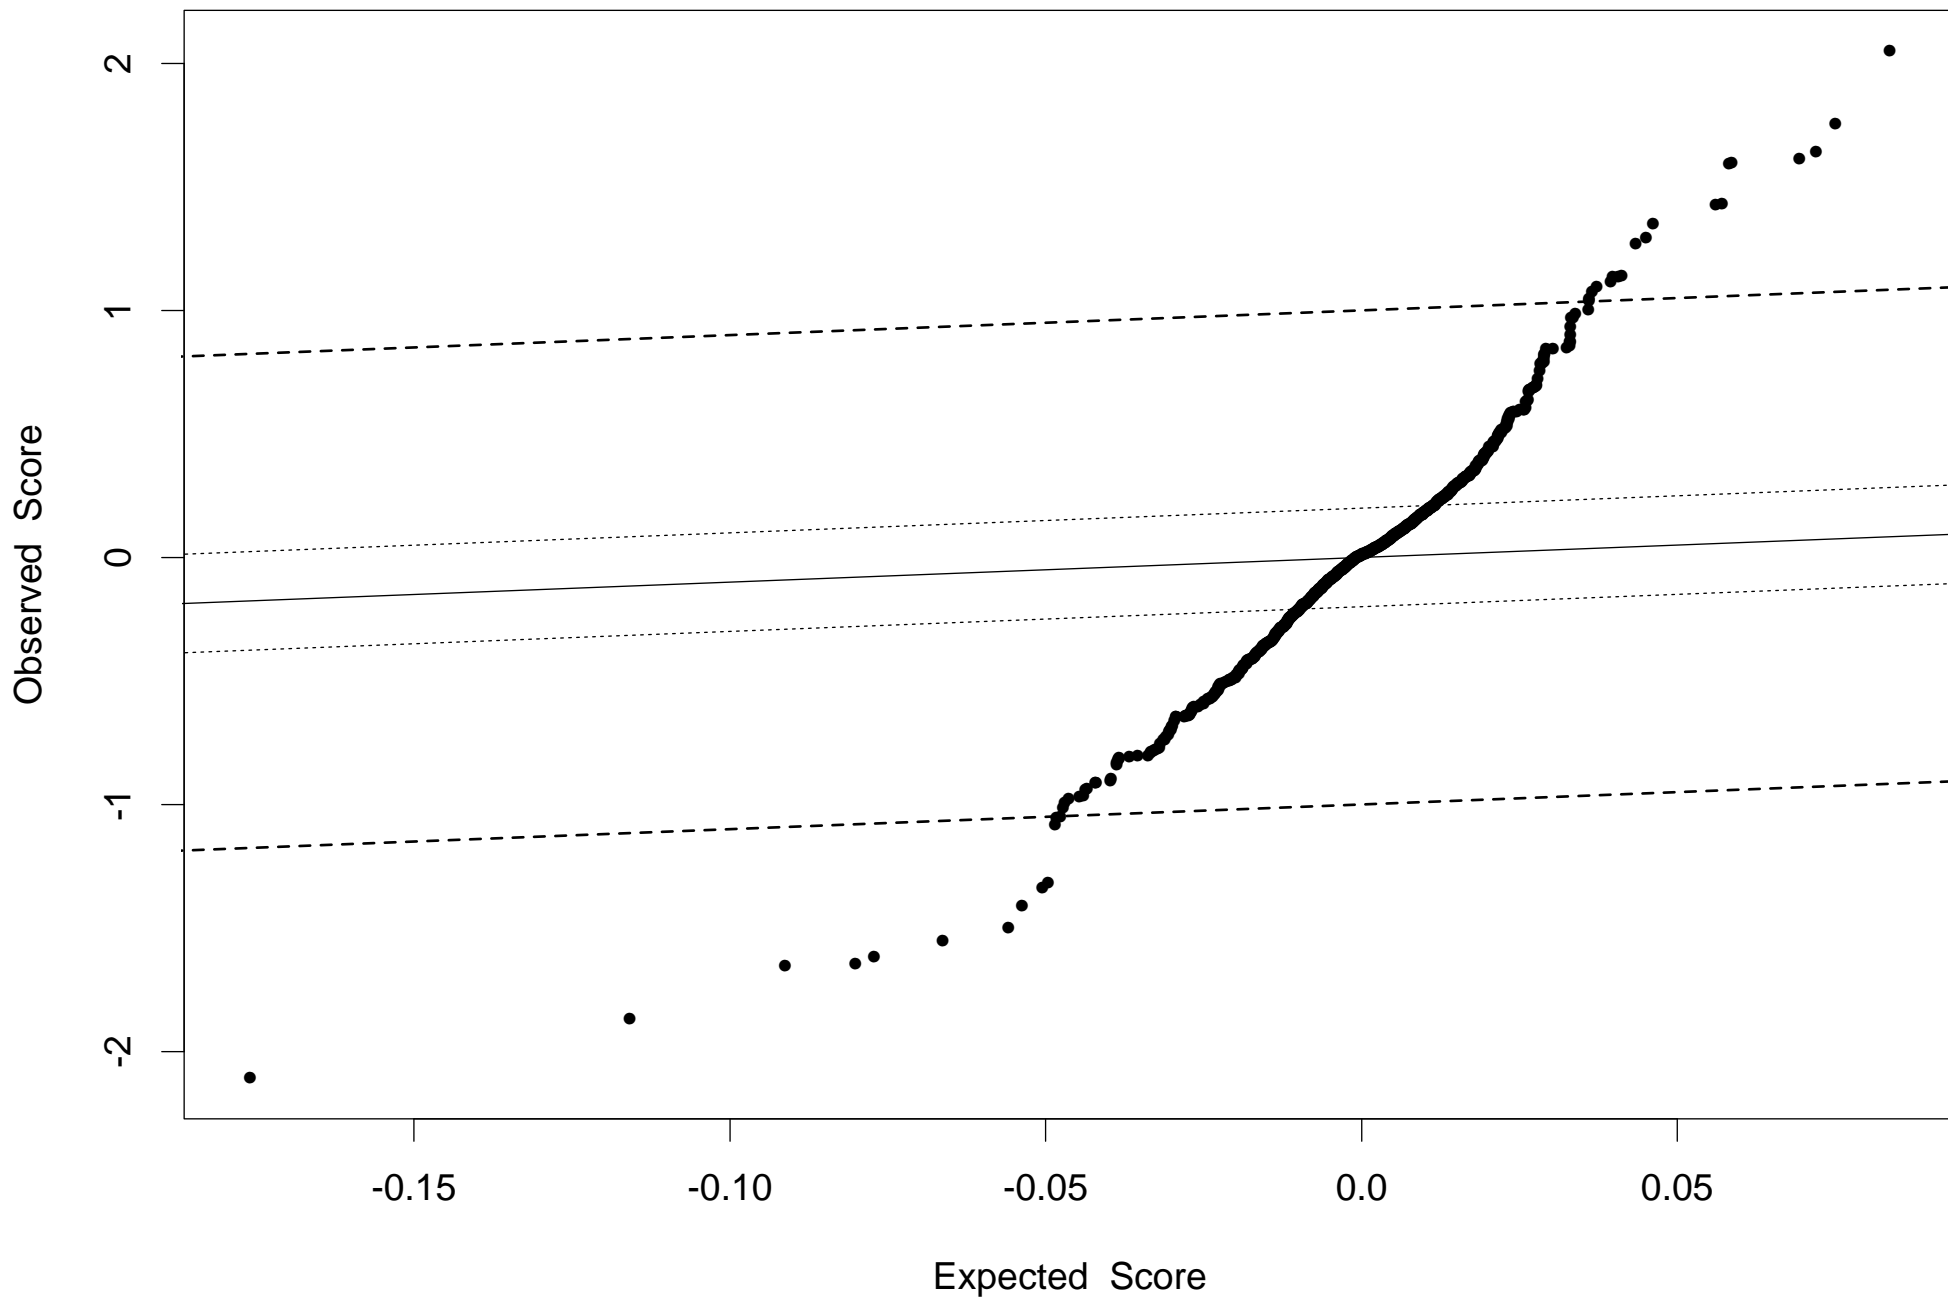

Supplement: pnas_211257298_1.pdf [file pnas_211257298_1.pdf]
